# Supplementary material for: Structural evolution induced by Au atom diffusion in Ag2S
Source: Royal Society of Chemistry journal article supplement (doi:10.1039/c9cc07660c), 2019-01-01
Supplement: c9cc07660c1.pdf [file c9cc07660c1.pdf]

## Supporting Information

# Structural evolution induced by Au atom diffusion in Ag<sub>2</sub>S

Benjin Jin,<sup>a</sup> Fu Zhang,<sup>b</sup> Geng Wu,<sup>a</sup> Tongwei Yuan,<sup>a</sup> Qian Wang,<sup>a</sup> Huang Zhou,<sup>a</sup> Yafei Zhao,<sup>a</sup>  
Genqiang Zhang<sup>b</sup> and Xun Hong<sup>\*a</sup>

<sup>a</sup>Center of Advanced Nanocatalysis (CAN), Department of Applied Chemistry, Hefei National Laboratory for Physical Sciences at the Microscale, University of Science and Technology of China, Hefei, Anhui 230026, P. R. China

<sup>b</sup>CAS Key Laboratory of Materials for Energy Conversion, Department of Materials Science and Engineering, University of Science and Technology of China, Hefei, Anhui 230026, P. R. China

\*Corresponding Author. E-mail for X. Hong: hongxun@ustc.edu.cn

## Experiment section

### Materials.

silver nitrate (AgNO<sub>3</sub>, 99%), hydrogen tetrachloroaurate(III) trihydrate (HAuCl<sub>4</sub>·3H<sub>2</sub>O, 99.9%), element sulfur (≥99.5%), sodium borohydride (NaBH<sub>4</sub>, 98%), sodium citrate dehydrate (C<sub>6</sub>H<sub>5</sub>Na<sub>3</sub>O<sub>7</sub>·2H<sub>2</sub>O, ≥99%), dodecylamine (DDA, 98%) were obtained from Shanghai Chemical Reagents, China. Oleylamine (>70%), 1,2,3,4-tetrahydronaphthalene (tetralin) and borane t-butylamine complex (TBAB) were purchased from Sigma Aldrich. All reagents were of analytical grade and used without further purification.

### Synthesis.

Phase transfer of Ag ions from water to toluene: The transfer of Ag ions from water to toluene were according to the previously reported methods.<sup>[1]</sup> In a typical experiment, 50 mL of aqueous AgNO<sub>3</sub> solution (1 mM) were mixed with 50 mL of ethanol containing 1 mL of dodecylamine. After 3 min of stirring, 50 mL of toluene were added, and stirred for another minute. The Ag ion concentration in toluene assuming complete transfer of the ions from water was 1 mM. The Ag ions in toluene were separated from the aqueous phase, and kept for further experiments.

Synthesis of 5.0 nm Au seed nanoparticles and phase transfer from water to toluene: 5.0 nm Au were synthesized as reported.<sup>[1]</sup> Au nanoparticles were transferred from water to toluene following the approach used for the phase transfer of Ag ions. Typically, the citrate-stabilized Au hydrosol was mixed with 20 mL of ethanol containing 0.4 mL of dodecylamine. After 3 min of stirring, 20 mL of toluene were added and stirred for another minute.

Synthesis of core-shell Au@Ag<sub>2</sub>S nanoparticles and the diffusion of Au in Ag<sub>2</sub>S: The synthesis of Au@Ag<sub>2</sub>S was reported with a minor modified.<sup>[1]</sup> 10 mL of Ag (I) ions in toluene were mixed with 4 mL of Au organosol in toluene. Next, 2 mg of elemental sulfur were added under vigorous stirring; stirring was continued for another 8 h. For the synthesis of Ag<sub>3</sub>AuS<sub>2</sub>-AuAg<sub>x</sub>, 10 mL of Ag (I) ions in toluene were mixed with 2 mL of Au organosol. The core-shell Au@Ag<sub>2</sub>S organosol in toluene was then hydrothermal treatment at 60°C for 90 minutes to complete the diffusion process.

Synthesis of Ag<sub>2</sub>S nanocrystals: 5 mL of Ag (I) ions in toluene and 2 mg of elemental sulfur were mixed with stirring for 8 h.

### Characterization.

X-ray photoelectron spectroscopy (XPS) spectra were taken on a Thermo ESCALAB MKII instrument equipped with a Mg K<sub>α</sub> (hν = 1253.6 eV) X-ray source. Binding energies (BE) were calibrated by setting the measured BE of C 1s to 284.6 eV. Transmission electron microscopy (TEM) images were acquired on a Hitachi H7700 transmission electron microscope at

an acceleration voltage of 100 kV. Aberration-corrected High angle annular dark-field scanning transmission electron microscopy (HAADF-STEM) was performed on a JEOL JEM-2010 LaB6 high-resolution transmission electron microscope operated at 200 kV. The *in situ* X-ray diffraction (XRD) patterns of samples were recorded on a diffractometer (Rigaku, Smartlab, Pt film as the base) operating at 45 kV voltage and 200 mA current with Cu K $\alpha$  radiation ( $\lambda = 1.5418 \text{ \AA}$ ).

### Water Splitting.

All the electrochemical experiments were conducted on the electrochemical workstation (CHI660E, Chen Hua Instruments, China) in a three-electrode system in 0.2M Na<sub>2</sub>SO<sub>4</sub> solution at room temperature. Samples were tested on the glassy carbon electrode (GCE, 0.07065 cm<sup>2</sup> in area) as the working electrode, Ag/AgCl as the reference electrodes and a Pt wire as the counter electrode. 2 mg catalysts were dispersed in 400  $\mu$ L of water/ethanol/Nafion solution (v/v/v=196/196/8) by sonication for 30 min. Then, 5  $\mu$ L well-dispersed catalysts (0.35 mg/cm<sup>2</sup>) were dropped on the glassy carbon electrode with drying naturally for test. The 300 W Xenon lamp light source (PLS-SXE 300, Beijing Perfect Light Co. Ltd, China) with a 420 nm cutoff filter was used to provide the visible light illumination.

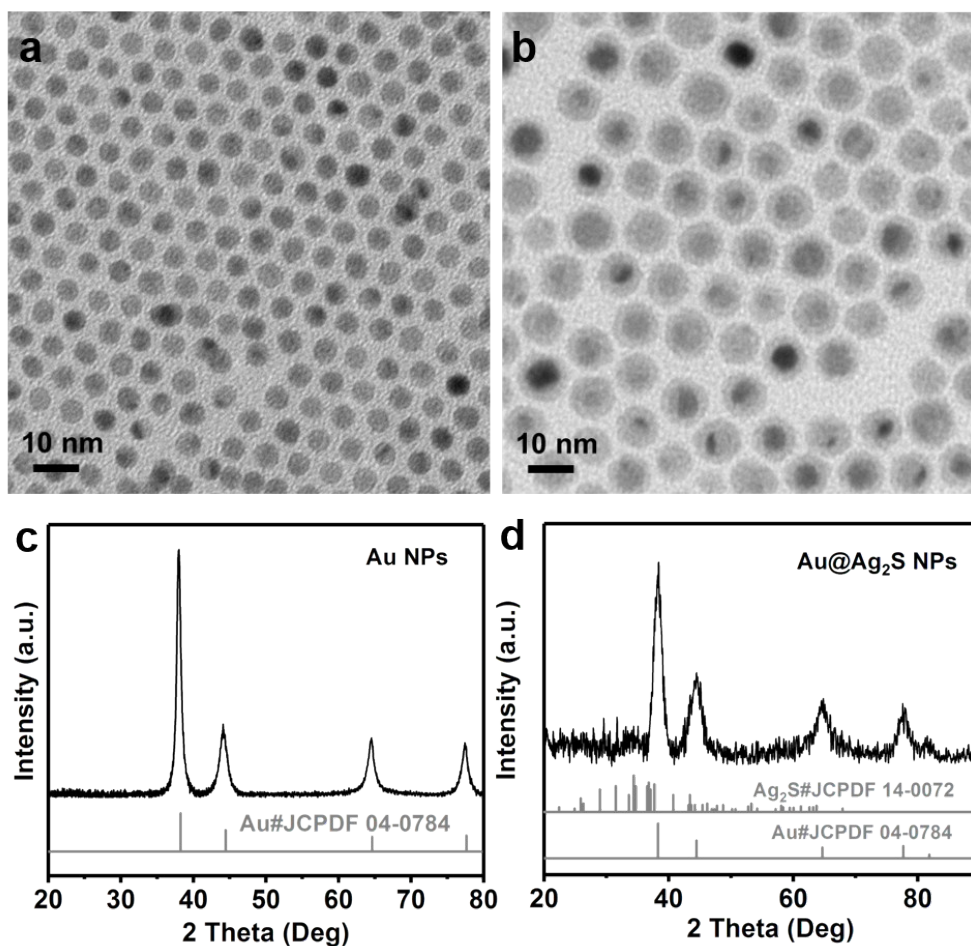

**Figure S1.** TEM images of (a) Au and (b) Au@Ag<sub>2</sub>S NPs. XRD patterns of (c) Au and (d) Au@Ag<sub>2</sub>S NPs.

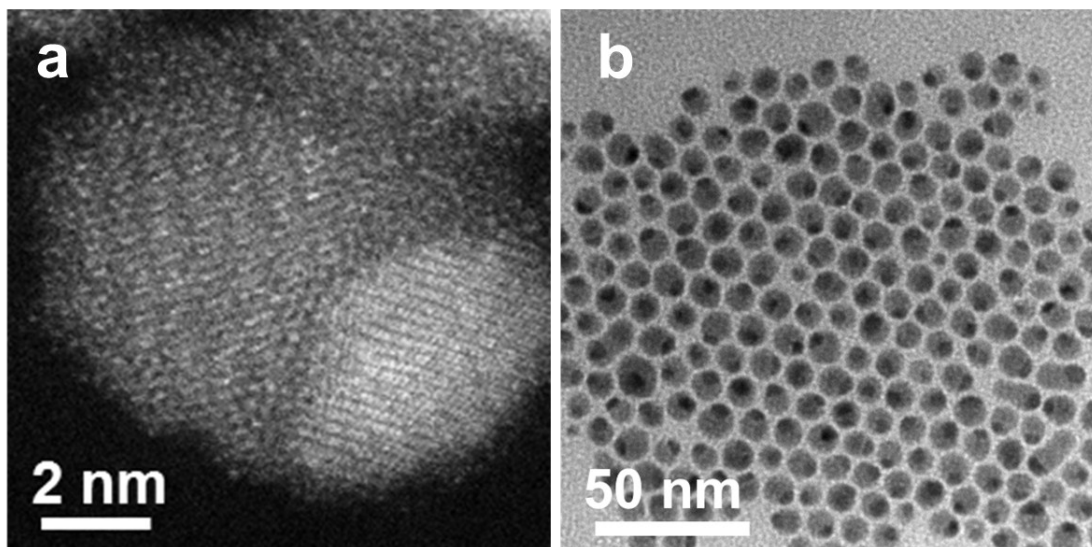

**Figure S2.** Atomic resolution aberration corrected HAADF-STEM image (a) and TEM images (b) of AuAgS-AuAg<sub>x</sub>.

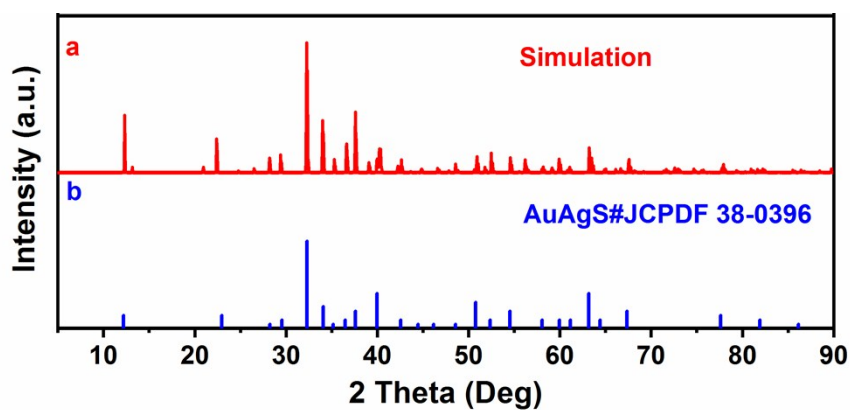

**Figure S3.** The simulated (a) and standard (b) XRD of AuAgS.

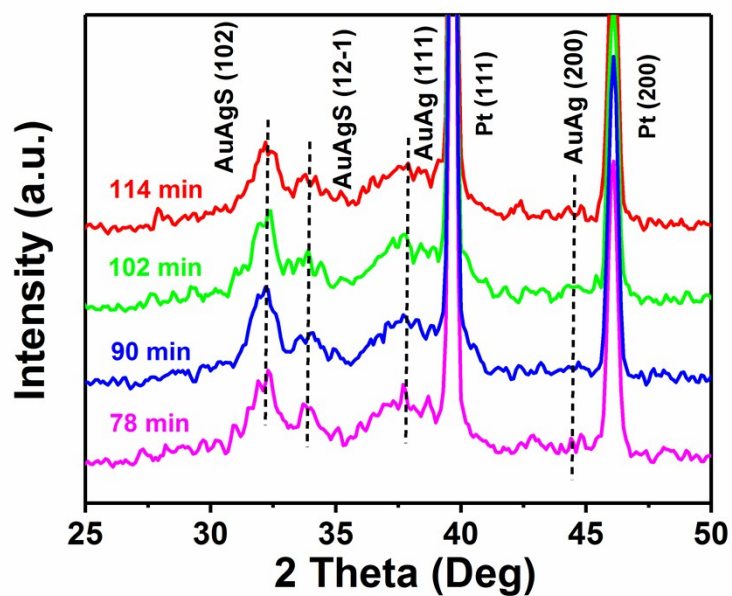

**Figure S4.** *In-situ* XRD patterns of structure evolution of Au@Ag<sub>2</sub>S from 78 min to 114 min.

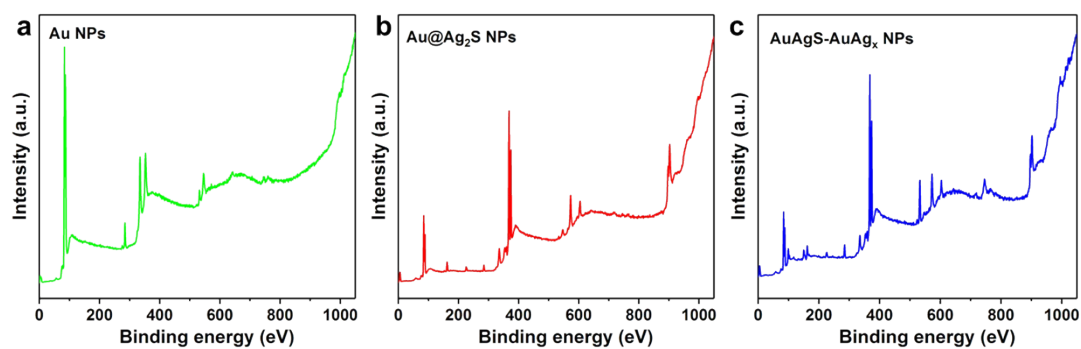

**Figure S5.** XPS spectra of (a) Au, (b) Au@Ag<sub>2</sub>S and (c) AuAgS-AuAg<sub>x</sub> NPs.

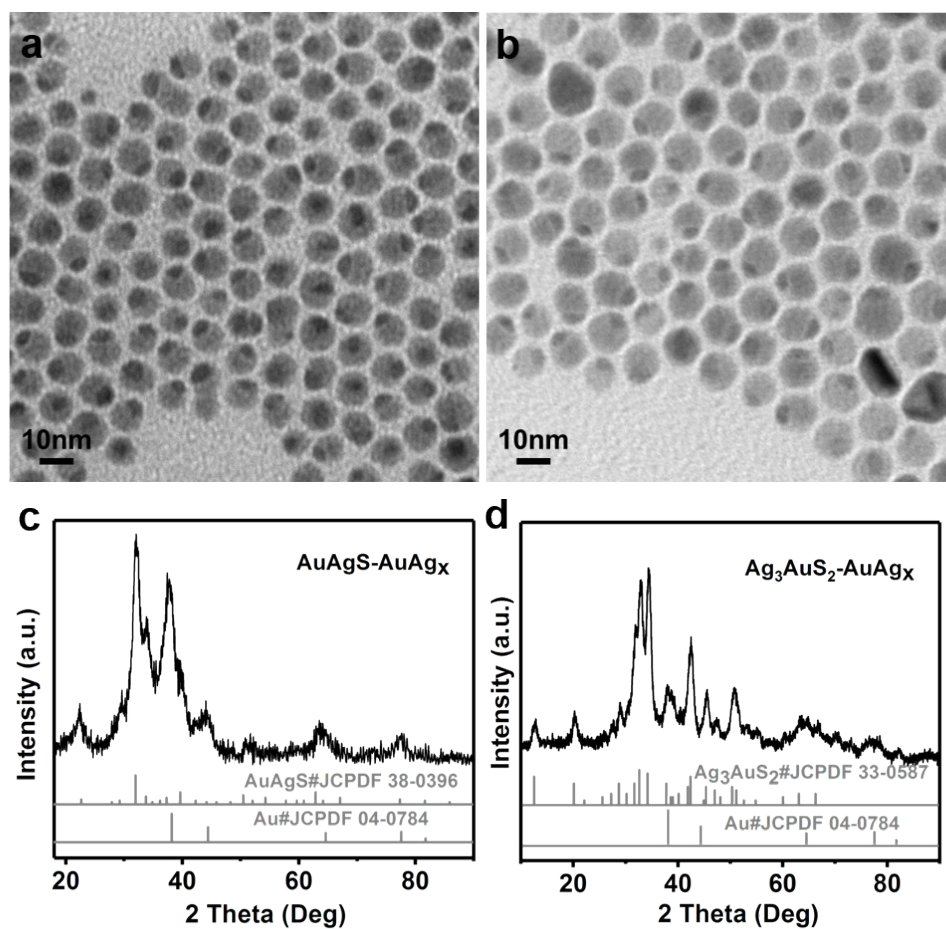

**Figure S6.** TEM image (a), and XRD pattern (c) of AuAgS-AuAg<sub>x</sub> NPs. TEM image (b) and XRD pattern (d) of Ag<sub>3</sub>AuS<sub>2</sub>-AuAg<sub>x</sub> NPs.

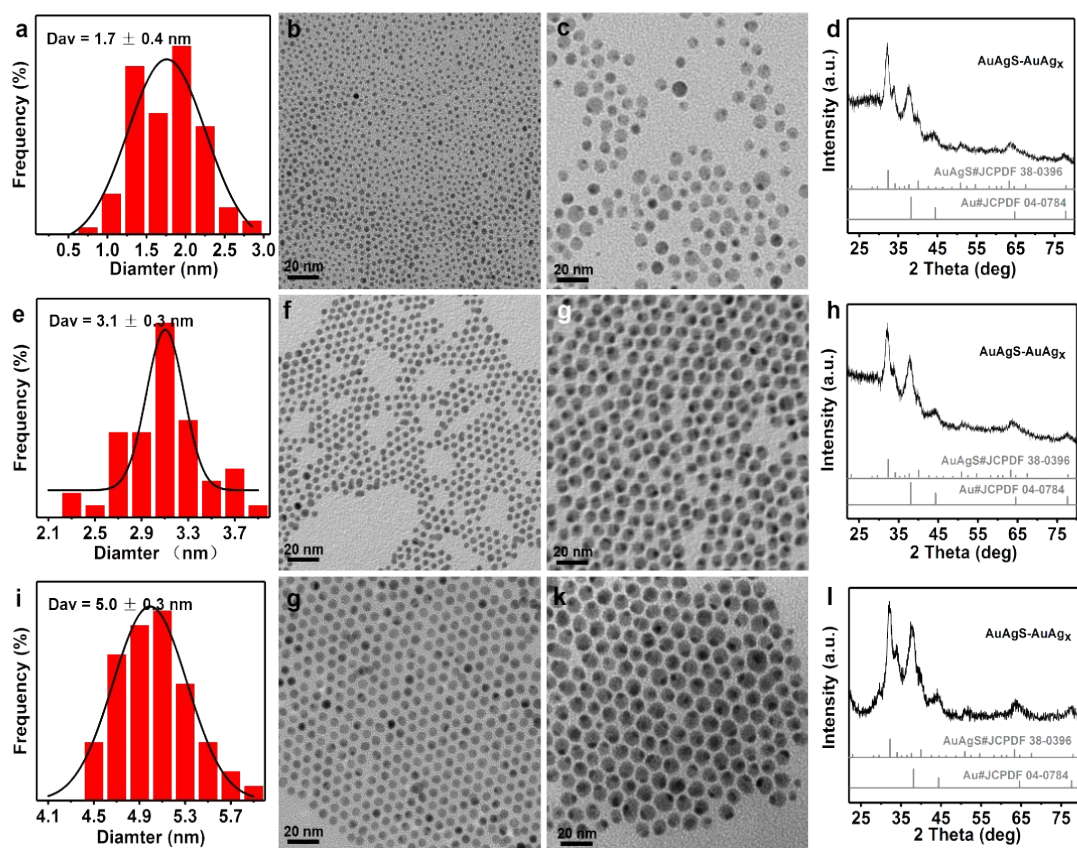

Figure S7. Particle size average histograms for 1.7 ± 0.4 nm Au (a), 3.1 ± 0.3 nm Au (e), 5.0 ± 0.3 nm Au (i); TEM images for 1.7 ± 0.4 nm Au (b), 3.1 ± 0.3 nm Au (f), 5.0 ± 0.3 nm Au (g); TEM images of AuAgS-AuAg<sub>x</sub> hybrid NCs obtained by 1.7 ± 0.4 nm Au (c), 3.1 ± 0.3 nm Au (g), 5.0 ± 0.3 nm Au (k); XRD patterns of AuAgS-AuAg<sub>x</sub> hybrid NCs obtained by 1.7 ± 0.4 nm Au (d), 3.1 ± 0.3 nm Au (h), 5.0 ± 0.3 nm Au (l).

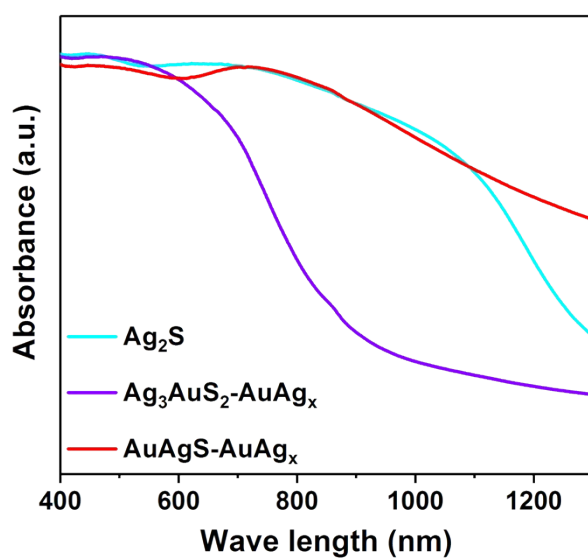

Figure S8. The UV-vis diffuse reflectance spectra (DRS) of Ag<sub>2</sub>S, Ag<sub>3</sub>AuS<sub>2</sub>-AuAg<sub>x</sub> and AuAgS-AuAg<sub>x</sub>.



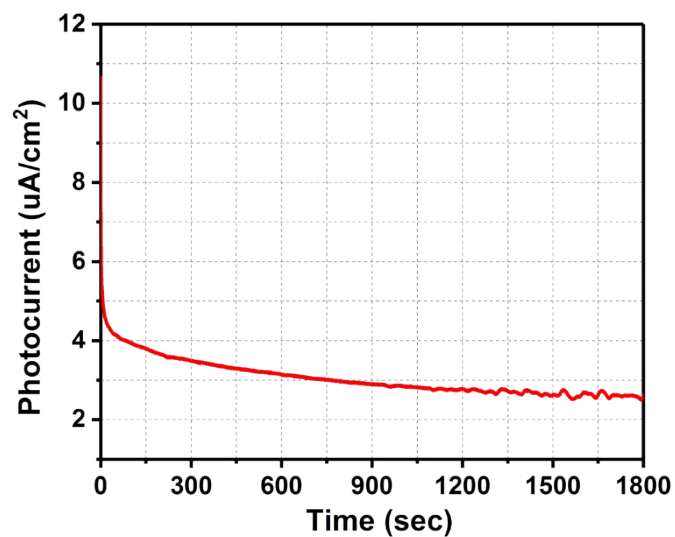

**Figure S9.** Time-dependent photocurrent measurement at an applied voltage of 0.4 V under the visible light illumination.

## References

1. Yang, J.; Ying, J. Y. *J. Am. Chem. Soc.* **2010**, *132*, 2114-2115.
